# Supplementary material for: Routes Alternatives with Reduced Emissions: Large-Scale Statistical Analysis of Probe Vehicle Data in Lyon
Source: MDPI journal article supplement (doi:10.3390/atmos13101681), 2022-10-14
Supplement: s1 [file s1]

Archive with 1 entries (1 files):
- atmosphere-1897390-supplementary.pdf
